# Supplementary material for: Effect of SARS-CoV-2 proteins on vascular permeability
Source: eLife. 2021 Oct 25;10:e69314. doi: 10.7554/eLife.69314 (PMC8545399; doi:10.7554/eLife.69314)
Supplement: Source data 1. [file elife-69314-supp2.xlsx]

## Sheet: TEER data
	First Experimental session				Second Experimental Session				Third Experimental Session
Untreated	156.2	145.2	145.2	157.3	156.2	145.2	145.2	157.3	143	141.9	145.2	149.6
eGFP	158.4	137.5			156.2	147.4	139.7	148.5	146.3	143	143	148.5
S	161.7	143	158.4	145.2	158.4	150.7	150.7	140.8	126.5	121	137.5	140.8
orf9c	161.7	163.9	130.9	132	135.3	137.5	134.2	156.2	143	137.5	140.8	143
N	151.8	148.5	138.6	159.5	159.5	136.4	159.5	135.3	121	126.5	137.5	132
orf3a	132	138.6	138.6	143	152.9	149.6	143	138.6	132	137.5	132	138.6
nsp4	140.8	147.4	132	146.3	132	135.3	143	145.2	132	143	132	140.8
orf10	143	158.4	133.1	127.6	123.2	126.5	163.9	157.3	137.5	137.5	126.5	123.2
M	140.8	124.3	136.4	148.5	130.9	135.3	137.5	136.4
orf7b	127.6	107.8	159.5	132	145.2	147.4	152.9	143	126.5	132	127.6	126.5
nsp10	143	146.3	136.4	123.2	134.2	130.9	137.5	126.5	126.5	130.9
nsp8	126.5	136.4	146.3	125.4	132	138.6	135.3	128.7	121	138.6	132	132
orf9b	156.2	132	95.7	125.4	160.6	163.9	145.2	146.3	130.9	115.5	116.6	101.2
orf8	121	132	126.5	121	145.2	150.7	165	156.2	125.4	108.9	121	114.4
nsp1	108.9	115.5	116.6	128.7	143	160.6	145.2	146.3	130.9	137.5	106.7	130.9
orf3b	149.6	147.4	136.4	139.7	123.2	121	114.4	116.6	127.6	132	132	126.5
nsp11	143	138.6	92.4	110	158.4	157.3	137.5	136.4	128.7	124.3	115.5	121
nsp5-wt	123.2	117.7	126.5	125.4	126.5	137.5	133.1	130.9	126.5	137.5	133.1	130.9
nsp15	88	132	143	160.6	118.8	128.7	132	138.6	121	126.5	132	126.5
E	158.4	139.7	119.9	111.1	127.6	128.7	128.7	130.9	126.5	126.5	121	123.2
nsp14	132	114.4	132	110	157.3	156.2	141.9	139.7	108.9	99	119.9	101.2
orf6	144.1	140.8	158.4	110	119.9	130.9	112.2	111.1	123.2	107.8	115.5	121
nsp9	127.6	128.7	124.3	132	137.5	136.4	119.9	123.2	114.4	105.6	119.9	123.2
nsp12	138.6	121	143	132	117.7	122.1	116.6	122.1	117.7	122.1	116.6	117.7
nsp5- c145a	112.2	115.5	115.5	129.8	114.4	119.9	137.5	137.5	113.3	118.8	117.7	101.2
nsp13	112.2	79.2	132	127.6	103.4	123.2	134.2	134.2	115.5	127.6	127.6	113.3
nsp7	108.9	96.8	104.5	99	122.1	119.9	121	123.2	112.2	121	126.5	99
orf7a	116.6	115.5	115.5	94.6	119.9	115.5	121	122.1	123.2	112.2	90.2	101.2
nsp2	110	97.9	123.2	122.1	92.4	117.7	110	99	92.4	114.4	127.6	99

## Sheet: CD31-Intensity
Untreated	eGFP	S	nsp2	nsp5-c145a	nsp7
First Experimental Session
1.30682	2.02942		0.677204	1.05543	0.629902
1.37529	1.30215	1.47963	0.767136	1.31207	0.646019
Second Experimental Session
1.7	1.4267	1.33829	0.913429	1.44138	0.499344
1.83	1.48	1.6	0.65	1.05543	1.01805
Third Experimental Session
1.86939	1.5	1.3	0.6	1.05543	0.440884
3					0.499344
					0.646019

## Sheet: VWF Intensity
Untreated	eGFP	S	nsp2	nsp5-c145a	nsp7
First Experimental Session
0.915146	0.864792	1.19362	1.38702	3.84045	1.968
3.52573	2.42062	2.57521	7.25698	6.34117	4.79879
Second Experimental Session
3.70674	2.85692	2.30312	4.89616	9.68971	6.00948
3.00722	0.555992	2.59953	1.63546		2.29635
Third Experimental Session
1.90964	0.532246	0.127792	2.36692	4.59118	3.01046
1.05581	0.0430106	0.0422477			1.2536
		0.283337

## Sheet: IL-6 Fold Change
		v1	v2	v3
	untreated	0.85	1.15	1
	eGFP	1.49	0.99	1.24158
	nsp15	1.49	1.71	1.60441
	N	2.25	2.81	2.52809
	orf9c	3.11	2.07	2.59137
	nsp8	3.68	2.66	3.17297
	S	4.26	2.54	3.39805
	nsp11	2.87	3.93	3.40116
	nsp4	3.27	4.28	3.77786
	nsp14	5.22	3.34	4.28132
	nsp7	4.2	4.43	4.31296
	nsp10	6.48	4.03	5.25373
	orf9b	8.38	3.92	6.14966
	nsp5- c145a	11.67	4.15	7.91019
	nsp2	8.6	9.93	9.26376
	nsp1	17.09	16.03	16.5573

## Sheet: B-Catenin Intensity
	Untreated	eGFP	nsp2	nsp_c145a	nsp7
	10.8686	10.1844	1.86588	4.3973	3.71828
	8.19559	7.99416	4.31375	2.76937	1.41353
	20.3621	6.69241	2.48089	4.99897	4.86145
	7.2382	7.55625	4.30994	2.76985	4.0019
	13.6146	11.3575	2.62184	3.47996	2.96721
	7.68738	9.59816	3.71475	1.47953	3.21746
	8.80642	13.488		2.66864	2.37071
	10.4754

## Sheet: Ve-Cadherin Intensity
Untreated	eGFP	nsp2	nsp_c145a	nsp7
14.2488	12.7832	1.36322	2.55995	8.43725
10.7215	7.00903	1.96104	2.6844	4.86584
13.9282	20.6225	4.2469	7.48615	1.16329
15.9837	13.0485	1.40305	1.43299	6.15101
12.6391	15.8903	3.68862	1.66769	2.4827
10.9418	12.5794	1.42956	1.2639	4.98056
5.51319	10.9335	1.40133		8.95872
12.7737

## Sheet: ZO-1 Intensity
Untreated	eGFP	nsp2	nsp_c145a	nsp7
2.37455	6.12774	2.07138	1.19352	0.626659
3.72286	3.73897	4.25491	1.0107	0.671862
7.634	7.44982	1.40762	0.825118	0.133132
9.99479	3.55368	0.688553	1.19467	0.93508
5.26113	3.87354	2.42634	3.25747	1.55611
5.37415	6.6164	2.35758	1.79901	1.70641
		3.36027	3.28169	2.01607

## Sheet: Occludin Intensity
Untreated	eGFP	nsp2	nsp_c145a	nsp7
7.87268	5.44806	5.25704	3.20997	3.43266
5.59692	4.60901	4.64487	5.84564	4.39205
6.14223	4	2.53515	5.65128	7.51457
7.83472	4	4.59108	3.56941	3.42503
5.92957		3.83291	2.76594	3.78275
4.57687		4.53234	5.1631	5.79863
			8.18892
