# Supplementary material for: Effect of SARS-CoV-2 proteins on vascular permeability
Source: eLife. 2021 Oct 25;10:e69314. doi: 10.7554/eLife.69314 (PMC8545399; doi:10.7554/eLife.69314)
Supplement: Supplementary file 1. — (A) Documented change by severe acute respiratory syndrome (SARS)-Cov-2. (B) Significant target for each viral protein. [file elife-69314-supp1.docx]

**Supplementary Information**

**Effect of SARS-CoV-2 proteins on vascular permeability**

Rossana Rauti1*, Meishar Shahoha2,3*, Yael Leichtmann-Bardoogo1 *, Rami Nasser4, Eyal Paz2,3, Rina Tamir1, Victoria Miller1, Tal Babich1,2, Kfir Shaked 1,2, Avner Ehrlich5, Konstantinos Ioannidis5, Yaakov Nahmias 5, Roded Sharan4, Uri Ashery 2,3,6#, and Ben M. Maoz1,3,6#

1Department of Biomedical Engineering, Tel Aviv University, Israel

2School of  Neurobiology, Biochemistry and Biophysics, The George S. Wise Faculty of Life Sciences, Tel Aviv University, Tel Aviv, Israel

3Sagol School of Neuroscience, Tel Aviv University, Tel Aviv, Israel

4Blavatnik School of Computer Science, Tel Aviv University, Tel Aviv, Israel

5Hebrew University of Jerusalem - Grass Center for Bioengineering

6The Center for Nanoscience and Nanotechnology, Tel Aviv University, Israel

* These authors are equal contributors

# Shared corresponding authors

Corresponding author

Uri Ashery, mail: uriashery@gmail.com

Ben M. Maoz, mail: bmaoz@tauex.tau.ac.il

**Supplementary File 1A. Documented change by SARS-Cov-2.**

| **Cell type** | **Function** | **Gene** | **Entrez Gene** | **Identified significant SARS-Cov-19 proteins** | **Distance** |
| --- | --- | --- | --- | --- | --- |
| Dendritic cells (T cell proliferation) | Impaired dendritic cells, induces T-cell proliferation and cytokine production and signal for activation of the T-cell | CD801 | 941 | [e; m; spike; nsp10; nsp11; nsp15; nsp7; orf3a; orf6; orf7a; orf8; orf9b; orf9c] | 2 |
|  | CD861 | 942 | [nsp10; nsp7] | 2 |
|  | INFα1 | 3439 |  | 2 |
|  | INF β1 | 3456 |  | 2 |
| T cell | Impaired T cell maturation and activation, reduced proliferation | INF λ1-4 | 3458 |  | 2 |
|  | TNFα1,3,4 | 7124 | [nsp12; orf8] | 1 |
| Production of pro-inflammatory cytokines | IL-22,3,4 | 3558 | [m; spike; nsp11; nsp12; nsp2; nsp7; orf10; orf8; orf9c] | 2 |
|  | IL-102,3,4 | 3586 | [spike; orf8; orf9c] | 2 |
|  | IL-72 | 3574 | [m; orf10; orf9c] | 2 |
|  | IL-62,4 | 3569 | [nsp11; nsp14; nsp5; nsp6; nsp9; orf10; orf8; orf9b] | 2 |
|  | IL-1β2 | 3553 | [orf8] | 2 |
|  | INF-ɑ2 | 3439 |  | 2 |
|  | MOP-12 |  |  |  |
|  | IP-102 | 3627 |  | 2 |
| reduced proliferation | CTLA-43 | 1493 | [nsp10; nsp15; nsp7; orf9b] | 1 |
|  | PD-11,3 | 5133 | [m; spike; nsp15; nsp4; orf6; orf9c] | 1 |
|  | Ki673 | 4288 | [n; nsp5; nsp7; nsp8; orf3a; orf3b; orf7a] | 1 |
|  | IL-53 | 3567 | [spike; nsp10; orf8] | 2 |
|  | IL-133 | 3596 | [m; spike; nsp10; nsp11; nsp12; nsp13; nsp2; nsp4; nsp6; nsp7; orf3a; orf3b; orf7a; orf8; orf9c] | 2 |
|  | IL-93,4 | 3578 |  |  |
|  | IL-223 | 50616 | [spike; orf9c] | 3 |
| NK | Decreased **IFN-γ production** by NK cells | INFλ5 | 3458 |  | 2 |
| Myeloid cells | systemic inflammation may impair the myeloid cells functionality | HLA-DR6 |  |  |  |
|  | CD646 | 2209 |  | 2 |
|  | CD66b6 | 1088 | [m; spike; nsp10] | 2 |
|  | CRP6 | 1401 | [orf8] | 1 |
|  | Ferritin l6 | 2512 |  | 1 |
|  | ferritin h6 | 2495 | [nsp4] | 1 |
|  | D-dimer6 |  |  |  |
|  | ﬁbrinogen7 | |  |  |
|  | LDH a6 | 3939 | [m; nsp11; nsp14; nsp4; nsp7; orf10; orf3b] | 1 |
|  | IL66 | 3569 | [nsp11; nsp14; nsp5; nsp6; nsp9; orf10; orf8; orf9b] | 2 |
| Lymphocyte | severe lymphocyte apoptosis | FAS7 | 355 | [nsp11; nsp2; nsp4; nsp7; orf3a; orf6; orf7a; orf9c] | 1 |
| Monocyte and macrophage | Activation and transcription of proinflammatory genes | ACE24 | 59272 | [e; nsp10; nsp12; nsp15; nsp2; nsp4; nsp6; orf10; orf7a; orf8; orf9b; orf9c] | 1 |
| IL64 | 3569 | [nsp11; nsp14; nsp5; nsp6; nsp9; orf10; orf8; orf9b] | 2 |
|  | IL-104 | 3586 | [spike; orf8; orf9c] | 2 |
|  | TNFα4 | 7124 | [nsp12; orf8] | 1 |
|  | ITGAM  cd1b4 | 3684 | [nsp11] | 2 |
|  | CD144 | 929 | [nsp5] | 2 |
|  | FCGR3Acd164 | 2214 | [nsp10] | 2 |
|  | CD684 | 968 | [m; orf6; orf7a] | 1 |
|  | CD804 | 941 | [e; m; spike; nsp10; nsp11; nsp15; nsp7; orf3a; orf6; orf7a; orf8; orf9b; orf9c] | 2 |
|  | CD1634 | 9332 | [n] | 1 |
|  | MRC1 cd2064 | 4360 | [orf8] | 2 |
|  | PDCD1  PD14 | 5133 |  | 1 |
| PB mononuclear cells | Activation of proinflammatory genes | IL1B4 | 3553 | [orf8] | 2 |
|  | CXCL24 | 2920 | [nsp4; nsp9] | 2 |
|  | CXCL84 | 3576 |  | 2 |
| PBMC | Activation of proinflammatory genes | GDF118 | 10220 | [nsp1; nsp5_c145a; orf8] | 1 |
|  | NOG8 | 9241 | [spike; nsp5_c145a; orf3a; orf8; orf9c] | 2 |
|  | IL108 | 3586 | [spike; orf8; orf9c] | 2 |
|  | CXCL108 | 3627 | nsp4 | 2 |
|  | TNFSF108 | 8743 | [spike; nsp11; nsp12; nsp14; nsp15; orf10; orf3a; orf9b] | 1 |
|  | NRG18 | 3084 | [spike; nsp11; nsp15; nsp4; nsp6; orf3a; orf6; orf7a; orf8; orf9c] | 1 |
|  | TIMP18 | 7076 | [nsp10; nsp6; nsp9; orf8] | 2 |
|  | C58 | 727 | [nsp11; nsp4; orf9c] | 2 |
|  | IL188 | 3606 | [nsp2; orf7a] | 2 |
|  | AREG8 | 374 | [e; nsp12; nsp6] | 2 |
|  | CCL48 | 6351 | [spike; nsp4; orf9c] | 1 |
|  | CMTM28 | 146225 | [orf3a; orf9c] | 1 |
|  | CXCL88 | 3576 |  | 2 |
|  | IFNλ8 | 3458 | [spike; nsp11; nsp13; nsp4; nsp7; orf9c] | 2 |
| Lymphocytes | SARS-CoV-2 infection may cause lymphocyte apoptosis | CTSL8 | 1514 | [nsp14] | 1 |
|  | CTSB8 | 1508 | [m; nsp11; nsp4; nsp5_c145a; nsp6; orf9b] | 1 |
|  | DDIT48 | 54541 | [orf9b] | 2 |
|  | RRAS8 | 6237 | [m; nsp2] | 1 |
|  | CTSD8 | 1509 | [m; nsp11; nsp14; nsp2; nsp4; nsp5_c145a; nsp6; nsp7; orf10; orf6; orf8] | 1 |
|  | BIRC58 | 332 | [nsp14; nsp15] | 1 |
|  | TNFSF108 | 8743 | [spike; nsp11; nsp12; nsp14; nsp15; orf10; orf3a; orf9b] | 1 |
|  | CTSZ8 | 1522 |  | 1 |
|  | NTRK18 | 4914 |  | 1 |
|  | IGFBP38 | 3486 | [nsp1; nsp14; nsp15; nsp4; orf8; orf9b] | 1 |
|  | CCNB18 | 891 | [nsp1; nsp11; nsp13] | 1 |
|  | RRM28 | 6241 | [nsp1; orf6] | 2 |
|  | CCNB28 | 9133 | [nsp1; nsp10; nsp11; nsp13; nsp14; nsp15; nsp2; orf8; orf9b] | 1 |
|  | GTSE18 | 51512 | [nsp10; nsp12; nsp13] | 1 |
|  | CDK18 | 983 | [nsp1; orf3b] | 1 |
|  | STEAP38 | 55240 | [spike; nsp4; nsp6; orf3a; orf7a] | 2 |
|  | TP53I38 | 9540 |  | 2 |
| BALF | Activation of proinflammatory cytokines | CXCL28 | 2920 | [nsp4; nsp9] | 2 |
|  | TGFB28 | 7042 | [e; nsp4; nsp9; orf6; orf8; orf9b] | 2 |
|  | CCL3L18 | 6349 | [spike; nsp4] | 2 |
|  | CXCL68 | 6372 | [nsp4; nsp9] | 2 |
|  | CCL88 | 6355 | [nsp4; nsp9] | 2 |
|  | SCGB3A18 | 92304 |  | 2 |
|  | TNFSF108 | 8743 | [spike; nsp11; nsp12; nsp14; nsp15; orf10; orf3a; orf9b] | 1 |
|  | CCL28,9 | 6347 | [nsp4; nsp9] | 2 |
|  | CXCL18 | 2919 | [orf10] | 1 |
|  | IL338 | 90865 | [e; nsp10; nsp5; orf8; orf9b] | 2 |
|  | GRN8 | 2896 | [nsp1; nsp11] | 1 |
|  | CXCL168 | 58191 |  | 1 |
| Immune cells of BALF | higher levels of inflammatory cytokines in lung macrophages from patients with severe COVID-19 infection. | IL-89 | 3576 |  | 2 |
|  | IL-69 | 3569 | [nsp11; nsp14; nsp5; nsp6; nsp9; orf10; orf8; orf9b] | 2 |
|  | IL-1β9 | 3553 | [orf8] | 2 |
|  | TNFα9 | 7124 | [nsp12; orf8] | 1 |
|  | CCL39 | 6348 | [m; nsp4; nsp7; orf9c] | 1 |
|  | CCL49 | 6351 | [spike; nsp4; orf9c] | 1 |
|  | CCL79 | 6354 | [spike; orf8] | 1 |
|  | CXCL99 | 4283 | [orf9c] | 1 |
|  | CXCL109 | 3627 | [nsp4] | 2 |
|  | CXCL119 | 6373 | [nsp4] | 2 |
| Primary lung epithelial cells | glycolysis | HK2*10 | 3099 | [nsp1; nsp11; nsp6; orf6; orf8; orf9b] | 1 |
| glycolysis | GPI10 | 2821 | [nsp11; nsp14; orf3] | 1 |
| glycolysis | PFKP10 | 5214 | [nsp11; nsp14; nsp15; nsp5_c145a; orf7a] | 1 |
| glycolysis | ENO2*10 | 2026 | [nsp11; nsp14; nsp15; nsp4; nsp5_c145a; nsp7; orf10] | 1 |
| glycolysis | PKM*10 | 5315 | [nsp11; nsp5; nsp7; orf7a; orf9b] | 1 |
| glycolysis | LDHA10 | 3939 | [m; nsp11; nsp14; nsp4; nsp7; orf10; orf3b] | 1 |
| glycolysis | ALDOA10 | 226 | [nsp11; nsp5_c145a; orf3b; orf6] | 1 |
| glycolysis | PGK110 | 5230 | [nsp11; nsp14; nsp5_c145a; orf3b; orf6] | 1 |
| glycolysis | BPGM*10 | 669 | [nsp15] | 2 |
| Pentose-Phosphate | PGD10 | 5226 | [m; nsp11; nsp14; nsp15; nsp4; nsp5_c145a; nsp9; orf3b; orf6; orf9b] | 1 |
| Pentose-Phosphate | PGLS10 | 25796 | [nsp10; nsp11; nsp15; nsp4; nsp5_c145a] | 1 |
| Pentose-Phosphate | RBKS10 | 64080 | [nsp11; nsp13; nsp15; nsp4; orf3a] | 2 |
| mitochondria | DNAJC15*10 | 29103 | [nsp7] | 2 |
| mitochondria | ATP1A1*10 | 476 | [m; nsp11; nsp6; nsp7; orf10; orf3b; orf6] | 1 |
| mitochondria | UQCRB10 | 7381 | [m; spike; nsp11; nsp2; nsp4; nsp5_c145a; nsp6; nsp7; orf3b; orf6] | 1 |
| mitochondria | IDH1*10 | 3417 | [nsp10; nsp11; nsp14; nsp15; nsp4; nsp5_c145a; orf3b; orf6] | 1 |
| mitochondria | CDK1*10 | 983 | [nsp1; orf3b] | 1 |
| palmitoylation | ZDHHC1410 | 79683 |  | 2 |
| palmitoylation | IFITM1*10 | 8519 |  | 2 |
| palmitoylation | IFITM3*10 | 10410 | [nsp6; orf3b] | 1 |
| lipogenesis | ACAA110 | 30 | [spike; nsp11; nsp12; nsp14; nsp15; nsp5_c145a; nsp6; orf3b] | 1 |
| lipogenesis | HMGCS1*10 | 3158 | [nsp13] | 1 |
| lipogenesis | ACAT210 | 39 | [n; nsp10; nsp11; nsp14; nsp15; nsp4; nsp5_c145a; nsp6; orf3b; orf6; orf7a; orf9b] | 1 |
| lipogenesis | BCKDK10 | 10295 | [nsp14; nsp6; orf7a] | 0 |
| lipogenesis | MVD10 | 4597 | [nsp10; nsp11; nsp14; nsp2; nsp4; orf3b; orf9b] | 2 |
| lipogenesis | FDFT110 | 2222 | [nsp6; nsp7; orf3a; orf3b] | 1 |
| lipogenesis | SQLE*10 | 6713 | [m; nsp4; nsp6; orf9c] | 2 |
| lipogenesis | DGAT110 | 8694 | [m; spike; nsp6; orf3a; orf9c] | 2 |
| lipogenesis | MTTP10 | 4547 | [nsp7; orf8] | 2 |
| oxidative stress | NFKB1*10 | 4790 | [nsp13; nsp5] | 1 |
| oxidative stress | JUN10 | 3725 | [e; m; n; nsp1; nsp10; nsp12; nsp13; nsp15; nsp4; nsp5; nsp7; nsp8; nsp9; orf10; orf3b; orf6; orf7a; orf9b] | 1 |
| oxidative stress | FOXO1*10 | 2308 | [nsp1; nsp11; nsp14; nsp15; nsp2; nsp5] | 1 |
| oxidative stress | GCLC*10 | 2729 | [nsp14; nsp15; nsp9; orf9b] | 1 |
| oxidative stress | HMOX2*10 | 3163 | [m; nsp2; nsp4; nsp6; nsp7; orf3b; orf9c] | 1 |
| oxidative stress | IL6*10 | 3569 | [nsp11; nsp14; nsp5; nsp6; nsp9; orf10; orf8; orf9b] | 2 |
| oxidative stress | SOD210 | 6648 | [m; nsp11; nsp14; nsp15; nsp5_c145a; nsp6; orf3b; orf6; orf8] | 1 |
| ER stress | ERN110 | 2081 | [nsp10; nsp11; nsp4; nsp5_c145a; nsp6; nsp9; orf3a; orf8; orf9b; orf9c] | 1 |
| ER stress | EIF2AK210 | 5610 | [n] | 1 |
| ER stress | ATF410 | 468 | [nsp9] | 1 |
| ER stress | CEBPB10 | 1051 |  | 2 |
| ER stress | DNAJB910 | 4189 | [nsp11; orf7a; orf9c] | 2 |
| Cardiomyocytes | cardiac muscle tissue development  regulation of viral process  actin filament organization  proteosomal protein catabolic process  cellular respiration  regulation of lymphocyte activation  sensory perception of smell  pos. reg. of receptor sig.pathway via JAK-STAT | ATP2A211 | 488 | [m; nsp2; nsp6; nsp7; orf3b; orf6; orf7a; orf9c] | 1 |
|  | ENO311 | 2027 | [nsp11; nsp13; nsp4; orf3b; orf6; orf9b] | 1 |
|  | ACTB11 | 60 | [m; spike; nsp5; nsp7; orf10; orf3b; orf9c] | 1 |
|  | TPM211 | 7169 |  | 1 |
|  | TPM411 | 7171 | [nsp11; nsp6; orf3b] | 1 |
|  | CALM311 | 808 | [nsp11; nsp13; nsp7] | 1 |
|  | TPM111 | 7168 | [spike; nsp11; nsp13; orf3b] | 1 |
|  | CALM211 | 805 | [nsp11; nsp13; nsp7] | 1 |
|  | MYL911 | 10398 | [e] | 1 |
|  | MYL611 | 4637 | [nsp11; nsp13; nsp15; orf10; orf3b] | 1 |
|  | TNNC111 | 7134 | [orf9b] | 2 |
|  | CKM11 | 1158 | [e; orf10; orf6; orf9b] | 1 |
|  | MYL711 | 58498 |  | 2 |
|  | MYH1111 | 4629 | [nsp11; nsp14; orf3b] | 1 |
|  | MYLK11 | 4638 | [e] | 2 |
|  | MYL411 | 4635 | [n; nsp10] | 2 |
|  | TNNI111 | 7135 |  | 2 |
|  | TPM311 | 7170 | [nsp11; nsp6; orf6] | 1 |
|  | MYH611 | 4624 | [nsp14; orf9c] | 1 |
|  | TNNI311 | 7137 | [nsp10; nsp11; nsp13; nsp15; orf3a; orf9b] | 1 |
|  | CAPZB11 | 832 | [nsp11; nsp5_c145a; orf9b] | 1 |
|  | ACTC111 | 70 | [nsp1] | 1 |
|  | MYOM211 | 9172 |  | 2 |
|  | TMOD111 | 7111 | [spike; orf6] | 1 |
|  | TTN11 | 7273 | [orf3a] | 1 |
|  | MYH811 | 4626 | [e] | 1 |
|  | MYO1G11 | 64005 | [nsp15; nsp2; nsp6; nsp7; orf3b] | 1 |
|  | TRIM6311 | 84676 |  | 1 |
|  | TNNT311 | 7140 | [nsp10; nsp13] | 1 |
|  | NEB11 | 4703 | [e; nsp1] | 2 |
|  | MYL311 | 4634 |  | 2 |
|  | OBSCN11 | 84033 | [nsp6; nsp9; orf3a] | 1 |
|  | MYH211 | 4620 | [spike] | 1 |
|  | MYO7A11 | 4647 | [orf3b] | 2 |
|  | MYO3A11 | 53904 |  | 2 |
|  | MYH711 | 4625 |  | 1 |
|  | MYH1511 | 22989 | [nsp7; orf8; orf9c] | 2 |
|  | MYO3B11 | 140469 | [m; nsp10; nsp5_c145a] | 1 |
|  | MYO1H11 | 283446 |  | 1 |
|  | MYO15A11 | 51168 | [nsp13] | 2 |
|  | MYLK211 | 85366 | [nsp1; nsp4; orf7a] | 2 |
|  | MYO7B11 | 4648 | [m] | 2 |
|  | MYO1A11 | 4640 | [nsp9] | 1 |
|  | MYH411 | 4622 |  | 1 |
|  | MYH111 | 4619 |  | 1 |
|  | MYH1311 | 8735 | [nsp5] | 1 |
|  | MYO1F11 | 4542 | [orf8] | 1 |
| Human bronchial epithelial cell line (16HBE) | Activation of proinflammatory cytokines | IKKβ, 12 | 3551 | [nsp12; nsp13; orf9b] | 1 |
|  | IFNλ12 | 3458 | [spike; nsp11; nsp13; nsp4; nsp7; orf9c] | 2 |
|  | TNF‐α12 | 7124 | [nsp12; orf8] | 1 |
|  | LTa312 |  |  |  |
|  | GMCSF12 |  |  |  |
|  | IL‐1β12 | 3553 | [orf8] | 2 |
|  | IL‐212 | 3558 | [m; spike; nsp11; nsp12; nsp2; nsp7; orf10; orf8; orf9c] | 2 |
|  | IL‐612 | 3569 | [nsp11; nsp14; nsp5; nsp6; nsp9; orf10; orf8; orf9b] | 2 |
|  | IL‐812 | 3576 |  | 2 |
|  | IL‐1212 | 3593 | [nsp11; nsp15; nsp8; orf8] | 1 |
|  | IL‐1312 | 3596 | [m; spike; nsp10; nsp11; nsp12; nsp13; nsp2; nsp4; nsp6; nsp7; orf3a; orf3b; orf7a; orf8; orf9c] | 2 |
|  | IL‐3312 | 90865 | [e; nsp10; nsp5; orf8; orf9b] | 2 |
|  | IL‐412 | 3565 | [m; spike; nsp10; nsp2; nsp4; nsp6; nsp7; orf10; orf8; orf9b; orf9c] | 2 |
|  | IL‐512 | 3567 | [spike; nsp10; orf8] | 2 |
|  | IL‐1012 | 3586 | [spike; orf8; orf9c] | 2 |
|  | IL‐1712 | 3605 | [spike; nsp12; orf8; orf9c] | 1 |
|  | IL‐2212 | 50616 | [spike; orf9c] | 3 |
| Neuronal cells | altered distribution of Tau | [Tau](https://www.ncbi.nlm.nih.gov/gene/4137)13 | 4137 | [n; nsp1; nsp10; nsp13; nsp7; nsp8; orf10; orf7a; orf9b] | 1 |
| apoptosis of neuronal cells | Caspase 313 | 836 | [nsp11; nsp12; nsp13; nsp14; nsp15; nsp4; nsp5_c145a; orf3a] | 1 |
|  | UNC13A | 23025 | [n; orf6] | 1 |
|  | RAB27A | 5873 | [nsp7] | 2 |
|  | RAB3A | 5864 | [nsp1; nsp10; nsp11; nsp15; nsp7; orf6; orf9c] | 1 |
|  | RIMS1 | 22999 | [nsp7; orf9b] | 2 |
|  | RPH3A | 22895 | [nsp7] | 1 |
|  | SNAP25 | 6616 | [spike; nsp10; nsp11; nsp15; nsp2; nsp4; nsp6; orf3a; orf9b] | 2 |
|  | SNCA | 6622 | [nsp11; nsp5_c145a; nsp6; nsp7; orf3b; orf8] | 1 |
|  | STX1A | 6804 | [orf3a] | 1 |
|  | STXBP1 | 6812 | [nsp10; nsp11; nsp15; nsp2; nsp4; orf3a] | 1 |
|  | STXBP5 | 134957 | [e; spike; nsp2; nsp6; orf3a; orf9b; orf9c] | 2 |
|  | Syp | 6855 | [nsp11] | 2 |
| Proximal tubule cells | decreased expression of the multi-ligand receptor megalin LRP2 | Megalin14 | 4036 | [nsp10; nsp14; nsp7; nsp9; orf3a] | 1 |
| decreased expression of the multi-ligand receptor megalin LRP3 | SLC22A1214 | 116085 | [spike; nsp6; nsp7; orf9b; orf9c] | 2 |
| decreased expression of the multi-ligand receptor megalin LRP4 | SLC34A114 | 6569 | [nsp11; nsp15; nsp7; orf9b] | 2 |
| decreased expression of the multi-ligand receptor megalin LRP5 | SLC34A314 | 142680 |  | 2 |
| decreased expression of the multi-ligand receptor megalin LRP6 | SLC6A1914 | 340024 | [e; nsp10; nsp13; nsp14; nsp15; nsp4; nsp5; nsp6; nsp7; nsp9; orf10; orf3a; orf3b; orf8; orf9b] | 2 |
| amino acid transporter | EAAT314 | 6505 | [spike; nsp6; nsp7; orf3b; orf9c] | 1 |
| amino acid transporter | PAT214 | 153201 | [n; spike; nsp1; nsp11; nsp12; nsp13; nsp14; nsp15; nsp6; nsp7; nsp8; nsp9; orf10; orf3a; orf3b; orf7a; orf9b] | 2 |
| amino acid transporter | SIT114 | 54716 |  | 2 |
| amino acid transporter | B^0AT114 | 340024 |  | 2 |
| amino acid transporter | B^0AT314 | 348932 |  | 1 |
| amino acid transporter | ASCT214 | 6510 | [spike; nsp6; nsp7; orf3a; orf3b; orf8] | 2 |
| amino acid transporter | SNAT314 | 10991 | [orf6; orf9c] | 2 |
| amino acid transporter | TAT114 | 117247 | [nsp14; nsp4; orf6; orf9c] | 2 |
| amino acid transporter | TMEM2714 | 57393 |  | 2 |
| amino acid transporter | SLC7A914 | 11136 |  | 2 |
| amino acid transporter | SLC3A114 | 6519 | [nsp7] | 2 |
| impaired tubular handling of uric acid | URAT114 | 116085 |  | 2 |
| impaired tubular handling of uric acid | OAT114 | 9356 | [nsp4; orf9c] | 2 |
| impaired tubular handling of uric acid | OAT314 | 9376 |  | 2 |
| impaired tubular handling of uric acid | OAT414 | 55867 | [n; orf9c] | 2 |
| impaired tubular handling of uric acid | GLUT914 | 56606 | [m; spike; nsp11; nsp15; nsp2; nsp6; nsp7; orf3b; orf8; orf9c] | 1 |
| impaired tubular handling of uric acid | ABCG214 | 9429 | [spike; nsp6; nsp7; orf3a; orf3b; orf9b] | 2 |
| impaired tubular handling of uric acid | NPT114 | 6568 |  | 1 |
| impaired tubular handling of uric acid | NPT414 | 10786 |  | 2 |
| Enterocytes (gut organoids) | Defense response to virus | IFI615 | 2537 |  | 2 |
|  | IFI2715 | 3429 |  | 2 |
|  | IFITM115 | 8519 |  | 2 |
|  | MX115 | 4599 | [orf9c] | 1 |
|  | RN7SK15 | 125050 | [e; nsp8] | 1 |
|  | ARC15 | 23237 | [nsp12] | 2 |
|  | DKK115 | 22943 | [nsp4; orf8; orf9c] | 2 |
|  | MT1G15 | 4495 | [nsp4] | 2 |
|  | SAMD915 | 54809 | [nsp15; nsp5_c145a] | 2 |
|  | IFIT315 | 3437 | [n; nsp15] | 1 |
|  | C10orf9915 | 387695 |  | 1 |
|  | IFIT215 | 3433 | [n] | 1 |
|  | NKX3-115 | 4824 |  | 1 |
|  | LINC0094115 | 1E+08 |  |  |
|  | HSPA615 | 3310 |  | 1 |
|  | IFIT115 | 3434 | [n; nsp10; nsp15] | 1 |
|  | IFI44L15 | 10964 | [orf8; orf9b] | 2 |
|  | CMPK215 | 129607 |  | 1 |
|  | RSAD215 | 91543 | [nsp1; nsp11; nsp13; orf9b] | 2 |
|  | ISG1515 | 9636 | [m; nsp10; nsp11; nsp12; nsp6; nsp7; nsp8] | 2 |
|  | OAS215 | 4939 |  | 2 |
|  | CXCL1115 | 6373 | [nsp4] | 2 |
|  | IFI4415 | 10561 | [nsp11; nsp4; nsp5_c145a; orf3b; orf8] | 1 |
|  | CXCL1015,16 | 3627 | [nsp4] | 2 |
|  | SLC34A215 | 10568 | [m; nsp6] | 2 |
|  | IFNλ16,17 | 3458 | [spike; nsp11; nsp13; nsp4; nsp7; orf9c] | 3 |
|  | IFN b117 | 3456 | [nsp10] | 2 |
|  | IFNL216 | 282616 |  | 2 |
|  | IFNL316 | 28617 |  | 1 |
|  | CCR116 | 1230 | [spike; nsp15; nsp4; orf9c] | 2 |
|  | CCR816 | 1237 | [nsp10; nsp2; orf9c] | 2 |
|  | IL1616 | 3603 |  | 2 |
|  | IL316 | 3562 | [nsp10; nsp11; nsp7; orf8; orf9b] | 2 |
|  | CCR216 | 729230 | [orf6; orf7a] | 2 |
|  | CCR516 | 1234 | [nsp4; orf3a] | 2 |
|  | IL516 | 3567 | [spike; nsp10; orf8] | 2 |

**Supplementary File 1B. Significant target for each viral protein.**

| **SARS-Cov-2 Proteins** | **Human proteins which are most effect** | **Number of proteins** |
| --- | --- | --- |
| **e** | [RN7SK; SLC6A19; MYL9; CKM; MYLK; MYH8; NEB; IL-33; JUN; CD80; ACE2; AREG; TGFB2; STXBP5] | 14 |
| m | [ISG15; SLC34A2; GLUT9; ATP2A2; ACTB; MYO3B; MYO7B; IL-2; IL-13; IL-4; LDHA; PGD; ATP1A1*; UQCRB; SQLE*; DGAT1; JUN; HMOX2*; SOD2; CD80; IL-7; PD-1; CD66b; CD68; CTSB; RRAS; CTSD; CCL3] | 28 |
| n | [IFIT3; IFIT2; IFIT1; PAT2; OAT4; MYL4; ACAT2; JUN; EIF2AK2; Ki67; CD163; UNC13A; Tau] | 13 |
| S | [IFNλ; CCR1; IL-5; SLC22A12; EAAT3; PAT2; ASCT2; GLUT9; ABCG2; ACTB; TPM1; TMOD1; MYH2; IL-2; IL-13; IL-4; IL-10; IL-17; IL-22; UQCRB; ACAA1; DGAT1; CD80; PD-1; CD66b; NOG; TNFSF10; NRG1; CCL4; STEAP3; CCL3L1; CCL7; SNAP25; STXBP5] | 34 |
| nsp1 | [RSAD2; PAT2; ACTC1; NEB; MYLK2; HK2*; CDK1*; JUN; FOXO1*; GDF11; IGFBP3; CCNB1; RRM2; CCNB2; GRN; RAB3A; Tau] | 17 |
| nsp10 | [IFIT1; ISG15; IFN b1; CCR8; IL-3; IL-5; Megalin; SLC6A19; MYL4; TNNI3; TNNT3; MYO3B; IL-13; IL-33; IL-4; PGLS; IDH1*; ACAT2; MVD; JUN; ERN1; CD80; CD86; CTLA-4; CD66b; ACE2; FCGR3Acd16; TIMP1; CCNB2; GTSE1; RAB3A; SNAP25; STXBP1; Tau] | 34 |
| nsp11 | [RSAD2; ISG15; IFI44; IFNλ; IL-3; SLC34A1; PAT2; GLUT9; ENO3; TPM4; CALM3; TPM1; CALM2; MYL6; MYH11; TPM3; TNNI3; CAPZB; IL-2; IL-6; IL-12; IL-13; HK2*; GPI; PFKP; ENO2*; PKM*; LDHA; ALDOA; PGK1; PGD; PGLS; RBKS; ATP1A1*; UQCRB; IDH1*; ACAA1; ACAT2; MVD; FOXO1*; SOD2; ERN1; DNAJB9; CD80; FAS; ITGAM  cd1b; TNFSF10; NRG1; C5; CTSB; CTSD; CCNB1; CCNB2; GRN; RAB3A; SNAP25; SNCA; STXBP1; Syp; Caspase 3] | 61 |
| nsp12 | [ARC; ISG15; PAT2; IKKβ; TNF-α; IL-2; IL-13; IL-17; ACAA1; JUN; ACE2; TNFSF1; AREG; GTSE1; Caspase 3] | 15 |
| nsp13 | [RSAD2; IFNλ; SLC6A19; PAT2; ENO3; CALM3; TPM1; CALM2; MYL6; TNNI3; TNNT3; MYO15A; IKKβ; IL-13; RBKS; HMGCS1*; NFKB1*; JUN; CCNB1; CCNB2; GTSE1; Tau; Caspase 3] | 23 |
| nsp14 | [Megalin; SLC6A19; PAT2; TAT1; MYH11; MYH6; IL-6; GPI; PFKP; ENO2*; LDHA; PGK1; PGD; IDH1*; ACAA1; ACAT2; BCKDK; MVD; FOXO1*; GCLC*; SOD2; TNFSF10'; CTSL; CTSD; BIRC5; IGFBP3; CCNB2; Caspase 3] | 28 |
| nsp15 | [SAMD9; IFIT3; IFIT1; CCR1; SLC34A1; SLC6A19; PAT2; GLUT9; MYL6; TNNI3; MYO1G; IL-12; PFKP; ENO2*; BPGM*; PGD; PGLS; RBKS; IDH1*; ACAA1; ACAT2; JUN; FOXO1*; GCLC*; SOD2; CD80; CTLA-4; PD-1; ACE2; TNFSF10; NRG1; BIRC5; IGFBP3; CCNB2; RAB3A; SNAP25; STXBP1; Caspase 3] | 38 |
| nsp2 | [CCR8; GLUT9; ATP2A2; MYO1G; IL-2; IL-13; IL-4; UQCRB; MVD; FOXO1*; HMOX2*; FAS; ACE2; IL-18; RRAS; CTSD; CCNB2; SNAP25; STXBP1; STXBP5] | 20 |
| nsp4 | [DKK1; MT1G; CXCL11; IFI44; CXCL10; IFNλ; CCR1; CCR5; SLC6A19; TAT1; OAT1; ENO3; MYLK2; IL-13; IL-4; ENO2*; LDHA; PGD; PGLS; RBKS; UQCRB; IDH1*; ACAT2; MVD; SQLE*; JUN; HMOX2*; ERN1; PD-1; ferritin h; FAS; ACE2; CXCL2; NRG1; C5; CCL4; CTSB; CTSD; IGFBP3; STEAP3; TGFB2; CCL3L1; CXCL6; CCL8; CCL2; CCL3; SNAP25; STXBP1; Caspase 3] | 49 |
| nsp5 | [SLC6A19; ACTB; MYH13; IL-6; IL-33; PKM*; NFKB1*; JUN; FOXO1*; Ki67; CD14] | 11 |
| nsp5_c145a | [SAMD9; IFI44; CAPZB; MYO3B; PFKP; ENO2*; ALDOA; PGK1; PGD; PGLS; UQCRB; IDH1*; ACAA1; ACAT2; SOD2; ERN1; GDF11; NOG; CTSB; CTSD; SNCA; Caspase 3] | 22 |
| nsp6 | [ISG15; SLC34A2; SLC22A12; SLC6A19; EAAT3; PAT2; ASCT2; GLUT9; ABCG2; ATP2A2; TPM4; TPM3; MYO1G; OBSCN; IL-6; IL-13; IL-4; HK2*; ATP1A1*; UQCRB; IFITM3*; ACAA1; ACAT2; BCKDK; FDFT1; SQLE*; DGAT1; HMOX2*; SOD2; ERN1; ACE2; NRG1; TIMP1; AREG; CTSB; CTSD; STEAP3; SNAP25; SNCA; STXBP5] | 40 |
| nsp7 | [ISG15; IFNλ; IL-3; Megalin; SLC22A12; SLC34A1; SLC6A19; EAAT3; PAT2; ASCT2; SLC3A1; GLUT9; ABCG2; ATP2A2; ACTB; CALM3; CALM2; MYO1G; MYH15; IL-2; IL-13; IL-4; ENO2*; PKM*; LDHA; DNAJC15*; ATP1A1*; UQCRB; FDFT1; MTTP; JUN; HMOX2*; CD80; CD86; CTLA-4; Ki67; FAS; CTSD; CCL; RAB27A; RAB3A; RIMS1; RPH3A; SNCA; Tau] | 45 |
| nsp8 | [RN7SK; ISG15; PAT2; IL-12; JUN; Ki67; Tau] | 7 |
| nsp9 | [Megalin; SLC6A19; PAT2; OBSCN; MYO1A; IL-6; PGD; JUN; GCLC*; ERN1; ATF4; CXCL2; TIMP1; TGFB2; CXCL6; CCL8; CCL2] | 17 |
| orf10 | [SLC6A19; PAT2; ACTB; MYL6; CKM; IL-2; IL-6; IL-4; ENO2*; LDHA; ATP1A1*; JUN; IL-7; ACE2; TNFSF10; CTSD; CXCL1; Tau] | 35 |
| orf3a | [CCR5; Megalin; SLC6A19; PAT2; ASCT2; ABCG2; TNNI3; TTN; OBSCN; IL-13; RBKS; FDFT1; DGAT1; ERN1; CD80; Ki67; FAS; NOG; TNFSF10; NRG1; CMTM2; STEAP3; SNAP25; STX1A; STXBP1; STXBP5; Caspase 3] | 27 |
| orf3b | [IFI44; SLC6A19; EAAT3; PAT2; ASCT2; GLUT9; ABCG2; ATP2A2; ENO3; ACTB; TPM4; TPM1; MYL6; MYH11; MYO1G; MYO7A; IL-3; GPI; LDHA; ALDOA; PGK1; PGD; ATP1A1*; UQCRB; IDH1*; CDK1*; IFITM3*; ACAA1; ACAT2; MVD; FDFT1; JUN; HMOX2*; SOD2; Ki67; SNCA] | 36 |
| orf6 | [CCR2; SNAT3; TAT1; ATP2A2; ENO3; CKM; TPM3; TMOD1; HK2*; ALDOA; PGK1; PGD; ATP1A1*; UQCRB; IDH1*; ACAT2; JUN; SOD2; CD80; PD-1; FAS; CD68; NRG1; CTSD; RRM2; TGFB2; UNC13A; RAB3A] | 28 |
| orf7a | [CCR2; PAT2; ATP2A2; MYLK2; IL-13; PFKP; PKM*; ACAT2; BCKDK; JUN; DNAJB9; CD80; Ki67; FAS; ACE2; CD68; NRG1; IL-18; STEAP3; Tau] | 20 |
| orf8 | [DKK1; IFI44L; IFI44; IL-3; IL-5; SLC6A19; ASCT2; GLUT9; MYH15; MYO1F; TNF-α; IL-1β; IL-2; IL-6; IL-12; IL-13; IL-33; IL-4; IL-10; IL-17; HK2*; MTTP; SOD2; ERN1; CD80; CRP; ACE2; MRC1 cd206; GDF11; NOG; NRG1; TIMP1; CTSD; IGFBP3; CCNB2; TGFB2; CCL7; SNCA] | 38 |
| orf9b | [IFI44L; RSAD2; IL-3; SLC22A12; SLC34A1; SLC6A19; PAT2; ABCG2; ENO3; TNNC1; CKM; TNNI3; CAPZB; IKKβ; IL-6; IL-33; IL-4; HK2*; PKM*; PGD; ACAT2; MVD; JUN; GCLC*; ERN1; CD80; CTLA-4; ACE2; TNFSF10; CTSB; DDIT4; IGFBP3; CCNB2; TGFB2; RIMS1; SNAP25; STXBP5; Tau] | 38 |
| orf9c | [MX1; DKK1; IFNλ; CCR1; CCR8; SLC22A12; EAAT3; SNAT3; TAT1; OAT1; OAT4; GLUT9; ATP2A2; ACTB; MYH6; MYH15; IL-2; IL-13; IL-4; IL-10; IL-17; IL-22; SQLE*; DGAT1; HMOX2*'; ERN1; DNAJB9; CD80; IL-7; PD-1; FAS; ACE2; NOG; NRG1; C5; CCL4; CMTM2; CCL3; CXCL9; RAB3A; STXBP5] | 41 |

**References:**

1. Zhou, R et al., Acute SARS-CoV-2 Infection Impairs Dendritic Cell and T Cell Responses, *Immunity*, **53**, 864-877.e5 (2020)
2. Akbari, A., Rezaie, J., Potential therapeutic application of mesenchymal stem cell-derived exosomes in SARS-CoV-2 pneumonia, *Stem Cell Res. Ther. Lond* **11**, 1–10 (2020)
3. Schub, D., et al., High levels of SARS-CoV-2 specific T-cells with restricted functionality in patients with severe course of COVID-19, *medRxiv*, 2020.07.08.20148718 (2020)
4. Wang, J., Jiang, M., Chen, X., Montaner, L. J., Cytokine storm and leukocyte changes in mild versus severe SARS‐CoV‐2 infection: Review of 3939 COVID‐19 patients in China and emerging pathogenesis and therapy concepts, *J. Leukoc. Biol*. (2020)
5. Jin, M., et al., Long-term Existence of SARS-CoV-2 in COVID-19 Patients: Host Immunity, Viral Virulence, and Transmissibility, preprint (2020)
6. Peruzzi, B. et al., Quantitative and qualitative alterations of circulating myeloid cells and plasmacytoid DC in SARS-CoV-2 infection, Immunology, **161**, 345-353 (2020)
7. Chen, Y., et al., The Novel Severe Acute Respiratory Syndrome Coronavirus 2 (SARS-CoV-2) Directly Decimates Human Spleens and Lymph Nodes, *medRxiv,* 2020.03.27.20045427 (2020)
8. Xiong, Y., et al., Transcriptomic characteristics of bronchoalveolar lavage fluid and peripheral blood mononuclear cells in COVID-19 patients, *Emerg. Microbes Infect*., **9**, 761-770 (2020)
9. Liao, M., et al., Single-cell landscape of bronchoalveolar immune cells in patients with COVID-19, *Nat. Med*., **26**, 6 (2020)
10. Ehrlich, A., Uhl, S., Ioannidis, K., et al., The SARS-CoV-2 Transcriptional Metabolic Signature in Lung Epithelium, *SSRN Electron. J*., 2020
11. Pérez-Bermejo, J. A., et al., SARS-CoV-2 infection of human iPSC-derived cardiac cells predicts novel cytopathic features in hearts of COVID-19 patients, *bioRxiv*, 2020.08.25.265561 (2020)
12. Liao, Y., et al., Distinct infection process of SARS-CoV-2 in human bronchial epithelial cell lines, *J. Med. Virol*., **92**, 2830-2838 (2020)
13. Ramani, A., et al., SARS-CoV-2 targets neurons of 3D human brain organoids, *EMBO J*., **39**,e106230 (2020)
14. Werion, A., et al., SARS-CoV-2 causes a specific dysfunction of the kidney proximal tubule, *Kidney Int.* (2020)
15. Lamers, M. M., et al., SARS-CoV-2 productively infects human gut enterocytes, *Science*, **369**, 50-54 (2020)
16. Zhou, J., et al., Infection of bat and human intestinal organoids by SARS-CoV-2, *Nat. Med*., **26**, 7 (2020)
17. Stanifer, M. L., et al., Critical Role of Type III Interferon in Controlling SARS-CoV-2 Infection in Human Intestinal Epithelial Cells, *Cell Rep*., **32**, 107863 (2020)
